# Supplementary material
Source: PubMed Central journal article supplement (PMC3753677)
Supplement: NIHMS491352-supplement-1.pdf [file NIHMS491352-supplement-1.pdf]

## SUPPLEMENTAL MATERIAL

### Modulating the motor system by action observation after stroke

#### Abbreviations:

|                                 |      |
|---------------------------------|------|
| Brodmann Area                   | BA   |
| Inferior Parietal Cortex        | IPC  |
| Superior Parietal Lobule        | SPL  |
| Amygdala                        | Amyg |
| Montreal Neurological Institute | MNI  |
| False Discovery Rate            | FDR  |
| Family Wise Error               | FWE  |
| T-value                         | T    |
| Left                            | L    |
| Right                           | R    |

## Supplemental Results

### Behavioral Results

As expected, for participants with stroke, mean movement time for the paretic right hand (13.94s) was longer than for the left hand (2.41s,  $t(11)=-7.22$ ,  $p=.001$ ). Mean FAS score for the paretic right hand (FAS=2.00) was lower than for the left hand (FAS=4.96,  $t(11)=8.34$ ,  $p=.001$ ). For non-disabled participants, mean movement time for the non-dominant left hand (1.90s) was longer than for the right hand (1.67s,  $t(11)=2.56$ ,  $p=.03$ ). Mean FAS score did not differ between hands (FAS=4.98). Mean movement time was longer for participants with stroke than non-disabled participants for both the right ( $t(22)=8.54$ ,  $p=.001$ ) and left hand ( $t(22)=2.05$ ,  $p=.05$ ). Mean FAS score was lower for participants with stroke than non-disabled participants for the right hand ( $t(22)=-8.29$ ,  $p=.001$ ), but did not differ for the left hand ( $p=.56$ ).

### Main Effect of Action Observation on Regions of Interest

For description, we performed a region of interest analysis for the main effect of action observation using one-sample t-tests. For participants with stroke, right (paretic) hand action observation lead to significant activations in the left inferior frontal gyrus pars opercularis (mean = 0.38,  $t(11) = 2.71$ ,  $p = .02$ , 95% CI: 0.07, 0.70) and the left precentral gyrus (mean = 0.48,  $t(11) = 3.44$ ,  $p = .005$ , 95% CI: 0.17, 0.78); and a trend toward significant activation in the left supramarginal gyrus (mean = 0.31,  $t(11) = 1.94$ ,  $p = .08$ , 95% CI: -0.04, 0.66).

**I. Main effect of right hand action observation.** Brain regions activated during right hand action observation for participants with stroke and non-disabled participants.

| BRAIN REGION                           | BA           | SIDE | T     | x   | y   | z   |
|----------------------------------------|--------------|------|-------|-----|-----|-----|
| <b>STROKE</b>                          |              |      |       |     |     |     |
| Inferior Parietal Lobule               |              | L    | 12.76 | -26 | -54 | 54  |
| Lingual Gyrus                          | 18           | L    | 10.13 | -6  | -84 | -10 |
| Calcarine Gyrus                        | 17           | L    | 10.05 | 0   | -84 | -8  |
| Lingual Gyrus                          | hOC3v V3v    | R    | 8.46  | 26  | -86 | -10 |
| Middle Occipital Gyrus                 | hOC5 V5      | L    | 8.35  | -46 | -72 | 2   |
| Precentral Gyrus                       |              | L    | 7.7   | -28 | -12 | 56  |
| Cerebellum                             | Lobule V     | R    | 7.65  | 32  | -34 | -30 |
| Fusiform Gyrus                         |              | R    | 7.2   | 34  | -72 | -18 |
| Cerebellum                             | Lobule VIIIb | R    | 6.22  | 22  | -44 | -50 |
| Supplementary Motor Area               |              | L    | 5.65  | -8  | 0   | 54  |
| Inferior Frontal Gyrus p. Opercularis  | 44           | L    | 5.25  | -44 | 10  | 28  |
| Supramarginal Gyrus*                   | IPC (PF)     | L    | 5.15  | -56 | -28 | 42  |
| Middle Frontal Gyrus                   |              | R    | 4.39  | 38  | -2  | 62  |
| Inferior Frontal Gyrus p. Opercularis  | 44           | L    | 3.72  | -56 | 14  | 14  |
| Precentral Gyrus                       | 44           | R    | 3.38  | 54  | 12  | 40  |
| Cerebellar Vermis                      |              |      | 3.31  | 6   | -72 | -38 |
| Cerebellum                             | Lobule VIIa  | R    | 3.26  | 6   | -76 | -36 |
| Precentral Gyrus                       |              | R    | 3.22  | 30  | -4  | 48  |
| <b>NON-DISABLED</b>                    |              |      |       |     |     |     |
| Angular Gyrus                          | hIP3         | R    | 12.79 | 30  | -62 | 48  |
| Postcentral Gyrus                      | IPC (PFt)    | R    | 11.69 | 56  | -18 | 30  |
| Cerebellum                             | Lobule VI    | R    | 10.65 | 38  | -54 | -24 |
| Inferior Frontal Gyrus p. Opercularis  |              | R    | 10.61 | 48  | 10  | 28  |
| Middle Occipital Gyrus                 | 17           | R    | 9.36  | 24  | -92 | 6   |
| Inferior Parietal Lobule               | hIP3         | R    | 8.91  | 34  | -48 | 52  |
| Superior Parietal Lobule               |              | L    | 8.72  | -28 | -56 | 62  |
| Inferior Parietal Lobule               | SPL (7PC)    | L    | 8.43  | -32 | -48 | 52  |
| Middle Cingulate Cortex                |              | L    | 7.45  | -12 | -18 | 46  |
| Middle Frontal Gyrus                   |              | L    | 7.15  | -28 | -6  | 58  |
| Thalamus                               |              | R    | 6.9   | 18  | -26 | 8   |
| Precentral Gyrus                       |              | R    | 6.7   | 40  | 0   | 50  |
| Supramarginal Gyrus*                   | IPC (PF)     | R    | 6.62  | 54  | -32 | 48  |
| Precentral Gyrus                       |              | L    | 5.97  | -52 | 4   | 44  |
| Supplementary Motor Area               |              | L    | 5.82  | -10 | 6   | 56  |
| Precentral Gyrus                       | 44           | L    | 5.77  | -58 | 8   | 24  |
| Thalamus                               |              | L    | 5.7   | -18 | -30 | 4   |
| Supplementary Motor Area               |              | R    | 5.43  | 8   | 14  | 54  |
| Fusiform Gyrus                         | Amyg (LB)    | R    | 4.48  | 36  | -4  | -30 |
| Middle Cingulate Cortex                | 6            | R    | 4.18  | 4   | 2   | 40  |
| Inferior Frontal Gyrus p. Triangularis | 44           | L    | 3.46  | -38 | 18  | 22  |
| Paracentral Lobule                     |              | L    | 3.4   | -10 | -38 | 74  |
| Amygdala                               | Amyg (LB)    | R    | 3.36  | 30  | 2   | -20 |
| Supplementary Motor Area               |              | R    | 3.2   | 8   | 2   | 54  |
| Supramarginal Gyrus                    | IPC (PFcm)   | L    | 3.14  | -50 | -40 | 24  |
| Precuneus                              | SPL (5M)     | R    | 3     | 4   | -50 | 66  |
| Precuneus                              |              | L    | 2.95  | -10 | -42 | 72  |

MNI coordinates,  $p < .05$  FDR corrected, \* $p < .05$  FWE small volume corrected.

**II. Main effect of left hand action observation.** Brain regions activated during left hand action observation for participants with stroke and non-disabled participants.

| BRAIN REGION                           | BA           | SIDE | T     | x   | y   | z   |
|----------------------------------------|--------------|------|-------|-----|-----|-----|
| <b>STROKE</b>                          |              |      |       |     |     |     |
| Fusiform Gyrus                         | hOC3v V3v    | L    | 11.93 | -20 | -86 | -8  |
| Inferior Occipital Gyrus               |              | L    | 11.72 | -26 | -84 | -10 |
| Precentral Gyrus                       | 6/44         | L    | 11.31 | -58 | 6   | 28  |
| Lingual Gyrus                          | 18           | R    | 10.91 | 20  | -84 | -8  |
| Calcarine Gyrus                        | 17           | R    | 10.26 | 18  | -84 | 6   |
| Lingual Gyrus                          | hOC3v V3v    | R    | 10.1  | 18  | -70 | -6  |
| Superior Parietal Lobule               | 2            | R    | 9.83  | 30  | -48 | 58  |
| Inferior Frontal Gyrus p. Opercularis* | 44           | L    | 8.79  | -58 | 8   | 28  |
| Superior Frontal Gyrus                 |              | R    | 6.67  | 30  | -8  | 64  |
| Superior Temporal Gyrus                | IPC (PFm)    | R    | 5.98  | 64  | -44 | 22  |
| Supramarginal Gyrus*                   | IPC (PF)     | R    | 5.74  | 66  | -40 | 20  |
| Supplementary Motor Area               |              | L    | 4.81  | -6  | 0   | 64  |
| Hippocampus                            |              | R    | 4.51  | 24  | -6  | -22 |
| Superior Frontal Gyrus                 |              | L    | 4.25  | -28 | -2  | 68  |
| Cerebellum                             | Lobule VIIIb | R    | 3.98  | 18  | -48 | -50 |
| Precentral Gyrus                       |              | R    | 3.91  | 56  | 8   | 40  |
| Cerebellum                             |              | L    | 3.72  | -14 | -50 | -50 |
| Cerebellum                             | Lobule V     | R    | 3.67  | 30  | -36 | -36 |
| Parahippocampal Gyrus                  |              | L    | 3.67  | -30 | -26 | -20 |
| Supplementary Motor Area               |              | R    | 3.56  | 10  | 0   | 60  |
| Precentral Gyrus                       |              | R    | 3.37  | 28  | -14 | 70  |
| Fusiform Gyrus                         |              | L    | 3.26  | -38 | -20 | -20 |
| Inferior Frontal Gyrus p. Triangularis | 44           | R    | 3.1   | 50  | 14  | 24  |
| Inferior Frontal Gyrus p. Triangularis | 45           | R    | 3.09  | 56  | 26  | 26  |
| Supplementary Motor Area               |              | R    | 3     | 14  | -6  | 62  |
| <b>NON-DISABLED</b>                    |              |      |       |     |     |     |
| Superior Parietal Lobule               | SPL (7P)     | R    | 11    | 20  | -72 | 48  |
| Cerebellum                             | Lobule VI    | R    | 10.96 | 34  | -56 | -24 |
| Cerebellum                             | Lobule VI    | L    | 10.03 | -26 | -58 | -18 |
| Lingual Gyrus                          | 18           | R    | 9.88  | 16  | -74 | 0   |
| Superior Parietal Lobule               |              | L    | 9.88  | -28 | -56 | 56  |
| Supramarginal Gyrus*                   | IPC (PF)     | L    | 8.65  | -54 | -34 | 48  |
| Inferior Frontal Gyrus p. Opercularis* | 44           | L    | 6.38  | -58 | 12  | 28  |
| Inferior Frontal Gyrus p. Opercularis* | 44           | R    | 6.3   | 52  | 12  | 30  |
| Supramarginal Gyrus*                   | IPC (PF)     | R    | 5.74  | 56  | -38 | 20  |
| Middle Cingulate Cortex                |              | L    | 4.79  | -12 | -22 | 42  |
| Amygdala                               |              | R    | 3.63  | 32  | 0   | -16 |
| Fusiform Gyrus                         |              | R    | 3.59  | 38  | -6  | -30 |
| Inferior Frontal Gyrus p. Triangularis | 45           | R    | 2.92  | 58  | 20  | 8   |

MNI coordinates,  $p < .05$  FDR corrected. \* $p < .05$  FWE small volume corrected.

**III. Brain activity compared between right hand and left hand action observation.** Brain regions showing greater activation during right compared to left or left compared to right hand action observation, in participants with stroke and in non-disabled participants. For non-disabled participants, no brain regions showed greater activations during right hand as compared to left hand action observation.

| BRAIN REGION                           | BA        | SIDE | T     | x   | y   | z   |
|----------------------------------------|-----------|------|-------|-----|-----|-----|
| <b>STROKE</b>                          |           |      |       |     |     |     |
| <b>RIGHT HAND &gt; LEFT HAND</b>       |           |      |       |     |     |     |
| Inferior Frontal Gyrus p. Opercularis* | 44        | L    | 5.32  | -44 | 6   | 20  |
| Postcentral Gyrus                      | 1/2       | L    | 10.72 | -38 | -38 | 66  |
| <b>LEFT HAND &gt; RIGHT HAND</b>       |           |      |       |     |     |     |
| Calcarine Gyrus                        | 17        | R    | 20.69 | 16  | -82 | 10  |
| Lingual Gyrus                          | 18        | R    | 17.65 | 14  | -66 | -4  |
| Postcentral Gyrus                      | 2         | R    | 8.81  | 36  | -48 | 64  |
| Middle Temporal Gyrus                  | hOC5 (V5) | R    | 5.12  | 48  | -66 | 6   |
| Inferior Parietal Lobule               | 2         | R    | 4.91  | 30  | -40 | 52  |
| Cerebellum                             | Lobule VI | L    | 4.37  | -26 | -44 | -22 |
| Middle Temporal Gyrus                  | hOC5 (V5) | R    | 4.13  | 54  | -66 | 2   |
| <b>NON-DISABLED</b>                    |           |      |       |     |     |     |
| <b>LEFT HAND &gt; RIGHT HAND</b>       |           |      |       |     |     |     |
| Superior Parietal Lobule               | 2         | R    | 14.01 | 34  | -50 | 62  |
| Lingual Gyrus                          | 17        | R    | 11.33 | 18  | -70 | 2   |
| Calcarine Gyrus                        | 17        | R    | 8.86  | 16  | -78 | 4   |
| Cerebellum                             | Lobule VI | L    | 8.28  | -8  | -60 | -6  |
| Superior Frontal Gyrus                 |           | R    | 7.88  | 20  | -10 | 64  |
| Supplementary Motor Area               |           | R    | 6.89  | 8   | -20 | 48  |
| Middle Frontal Gyrus                   |           | R    | 6.81  | 44  | -4  | 56  |
| Precentral Gyrus                       |           | R    | 6.78  | 30  | -16 | 66  |
| Middle Occipital Gyrus                 | 17        | L    | 6.54  | -16 | -96 | 4   |
| Supplementary Motor Area               |           | R    | 5.83  | 14  | 4   | 70  |
| Postcentral Gyrus                      | 2         | R    | 5.77  | 38  | -32 | 48  |
| Inferior Parietal Lobule               | 2         | R    | 5.4   | 40  | -40 | 54  |
| Middle Temporal Gyrus                  | hOC5 (V5) | R    | 5.15  | 46  | -64 | 0   |

MNI coordinates,  $p < .05$  FDR corrected. \* $p < .05$  FWE small volume corrected.
