# Supplementary material
Source: PubMed Central journal article supplement (PMC3753677)

## Acknowledgment Permission Form

Journal Stroke  
Manuscript No. STROKE2013001105R2  
First author Garrison, Kathleen A  
Title of work Modulating the motor system by action observation after stroke

### Acknowledgment Permission:

Authors must provide written permission/approval from all individuals mentioned by name in the Acknowledgements section of a submitted manuscript. By signing this form, any and all acknowledged persons therefore state that they have read and approved the mention of their names in the Acknowledgment section of the aforementioned paper.

Printed Name Alicia Johnson

Signature

Date 4-24-13



Supplement: NIHMS491352-supplement-2.pdf [file NIHMS491352-supplement-2.pdf]
