# Supplementary material
Source: PubMed Central journal article supplement (PMC3753677)
Supplement: NIHMS491352-supplement-6.pdf [file NIHMS491352-supplement-6.pdf]

## Acknowledgment Permission Form

Journal                      Stroke  
Manuscript No.            STROKE2013001105R2  
First author                Garrison, Kathleen A  
Title of work                Modulating the motor system by action observation after stroke

### Acknowledgment Permission:

Authors must provide written permission/approval from all individuals mentioned by name in the Acknowledgements section of a submitted manuscript. By signing this form, any and all acknowledged persons therefore state that they have read and approved the mention of their names in the Acknowledgment section of the aforementioned paper.

Printed Name                Hanna Damasio

Signature



Date

May 9, 2013
